# Supplementary material
Source: publisher site journal article supplement (https://mbmg.pensoft.net/article/download/suppl/3916257/)
Supplement: Supplementary file 1

**Supplementary Table 6.** Species level taxa (BOLD Data), at 3 minimum read depth. Underlined taxa were changed based on the distribution of taxa in the study zone:

| Merino Only | Dorper Only | Goat Only | Dorper and Merino | Merino and Goat | Dorper and Goat | Dorper, Merino and Goat |
| --- | --- | --- | --- | --- | --- | --- |
| Brassicaceae species | *Centipeda minima* | *Abutilon theophrasti* | *Atriplex* sp. | *Casuarina* sp. | *Brassica rapa* | *Austrostipa* sp. |
| *Centipeda minima* | *Dissocarpus biflorus* | *Dissocarpus* sp. | *Austrostipa nodosa* | *Sclerolaena obliquicuspis* | *Erodium cygnorum* | *Chenopodium* sp. |
| *Cullen australasicum* | *Enneapogon avenaceus* |  | *Brachyscome* sp. |  | *Marsilea* sp. | *Eucalyptus lehmannii* |
| *Psilocaulon* sp. | *Erodium cicutarium* |  | *Calotis* sp. |  |  | *Eucalyptus* sp. |
|  | *Erodium* sp. |  | *Calotis squamigera* |  |  | *Medicago minima* |
|  | *Heliotropium* sp. |  | *Convolvulus* sp. |  |  | *Medicago sativa* |
|  | *Maireana integra* |  | *Limonium* sp. |  |  | *Medicago* sp. |
|  | *Malacocera tricornis* |  | *Lotus* sp. |  |  | *Sclerolaena* sp. |
|  | *Medicago polymorpha* |  | *Maireana* sp. |  |  |  |
|  | *Sclerolaena diacantha* |  | *Solanum* sp. |  |  |  |
|  | *Senecio* sp. |  | *Tetragonia* sp. |  |  |  |
|  | *Sonchus tenerrimus* |  | *Vittadinia sulcata* |  |  |  |
